# Supplementary material for: Preemptive angioplasty for contralateral leg stenosis following EXCLUDER Iliac Branch Endoprosthesis implantation
Source: Oxford University Press journal article supplement (doi:10.1093/jscr/rjz191), 2019-08-23
Supplement: supplementary_video_rjz191.docx [file supplementary_video_rjz191.docx]

**Video 1**

Intraoperative angiography at anterior–posterior view immediately after the completion of the endovascular aortic repair shows no stenosis and/or flow delay in the left leg.

**Video 2**

Preangioplasty image, left anterior oblique view, shows critical stenosis in the contralateral leg in the terminal aorta.

**Video 3**

Angiography shows improvement in the stenosis following balloon angioplasty and self-expandable stent implantation.
